# Supplementary material
Source: PubMed Central journal article supplement (PMC7983159)
Supplement: NIHMS1674949-supplement-Supplemental_table.pdf [file NIHMS1674949-supplement-Supplemental_table.pdf]

Supplementary Table: Multivariable regression analysis of clinical based nomograms with mpMRI results for EPE, SVI and LNI at RP

| <b>OCD</b>                      |                    |         |                      |         |
|---------------------------------|--------------------|---------|----------------------|---------|
| Variables                       | Sbx Partin Table   |         | Sbx MSKCC Nomogram   |         |
|                                 | OR (95% CI)        | P value | OR                   | P value |
| Nomogram using Sbx per % change | 1.02 (1.01-1.03)   | <0.001* | 1.03 (1.01-1.04)     | <0.001* |
| <b>mpMRI findings</b>           |                    |         |                      |         |
| NIH Suspicion Score             |                    |         |                      |         |
| Low                             |                    |         |                      |         |
| Intermediate                    | 2.16 (0.63-7.41)   | 0.839   | 2.32 (0.67-7.99)     | 0.183   |
| High                            | 0.94 (0.27-3.30)   | 0.918   | 0.94 (0.27-3.30)     | 0.917   |
| EPE                             | 0.37 (0.19-0.71)   | 0.003*  | 0.35 (0.19-0.68)     | 0.002*  |
| SVI                             | 0.32 (0.11-0.95)   | 0.040*  | 0.33 (0.07-0.91)     | 0.052   |
| Largest Lesion Diameter, cm     | 0.64 (0.42-0.99)   | 0.046*  | 0.63 (0.41-0.98)     | 0.039*  |
| <b>EPE</b>                      |                    |         |                      |         |
| Nomogram using Sbx per % change | 1.04 (1.01-1.06)   | 0.001*  | 1.03 (1.01-1.04)     | <0.001* |
| <b>mpMRI findings</b>           |                    |         |                      |         |
| NIH Suspicion Score             |                    |         |                      |         |
| Low                             |                    |         |                      |         |
| Intermediate                    | 0.43 (0.12-1.52)   | 0.190   | 0.38 (0.11-1.31)     | 0.126   |
| High                            | 0.67 (0.18-2.41)   | 0.536   | 0.66 (0.19-2.36)     | 0.527   |
| EPE                             | 3.06 (1.59-5.87)   | 0.001*  | 2.75 (1.43-5.31)     | 0.003*  |
| SVI                             | 1.68 (0.55-5.11)   | 0.360   | 1.70 (0.55-5.24)     | 0.360   |
| Largest Lesion Diameter, cm     | 2.33 (1.48-3.65)   | <0.001* | 2.07 (1.32-3.24)     | 0.001*  |
| <b>SVI</b>                      |                    |         |                      |         |
| Nomogram using Sbx per % change | 1.05 (1.01-1.09)   | 0.021*  | 1.05 (1.03-1.08)     | <0.001* |
| <b>mpMRI findings</b>           |                    |         |                      |         |
| NIH Suspicion Score             |                    |         |                      |         |
| Low                             |                    |         |                      |         |
| Intermediate                    | 0.14 (0.02-1.14)   | 0.066   | 0.12 (0.02-0.97)     | 0.047*  |
| High                            | 0.59 (0.09-3.88)   | 0.582   | 0.50 (0.08-3.33)     | 0.474   |
| EPE                             | 1.70 (0.61-4.72)   | 0.313   | 1.51 (0.51-4.44)     | 0.453   |
| SVI                             | 28.1 (8.65-91.29)  | <0.001* | 35.86 (10.48-122.68) | <0.001* |
| Largest Lesion Diameter, cm     | 1.39 (0.76-2.55)   | 0.289*  | 1.15 (0.61-2.17)     | 0.654   |
| <b>LNI</b>                      |                    |         |                      |         |
| Nomogram using Sbx per % change | 1.09 (1.03-1.15)   | 0.002*  | 1.03 (1.00-1.05)     | 0.036*  |
| <b>mpMRI findings</b>           |                    |         |                      |         |
| NIH Suspicion Score             |                    |         |                      |         |
| Low                             |                    |         |                      |         |
| Intermediate                    | 0.13 (0.01-1.67)   | 0.117   | 0.15 (0.01- 1.81)    | 0.136   |
| High                            | 0.51 (0.05-4.88)   | 0.556   | 0.54 (0.06- 5.09)    | 0.588   |
| EPE                             | 2.80 ( 1.05- 7.50) | 0.040*  | 2.54 (0.95- 6.77)    | 0.062   |
| SVI                             | 3.24 (0.94- 11.21) | 0.063   | 2.66 (0.74-9.52)     | 0.132   |
| Largest Lesion Diameter, cm     | 2.10 (1.64- 6.82)  | 0.017*  | 2.09 (1.17-3.76)     | 0.013*  |

\* significant at p<0.05
